# Supplementary material
Source: MDPI journal article supplement (https://www.mdpi.com/1999-4907/13/7/1137)
Supplement: s1 [file s1]

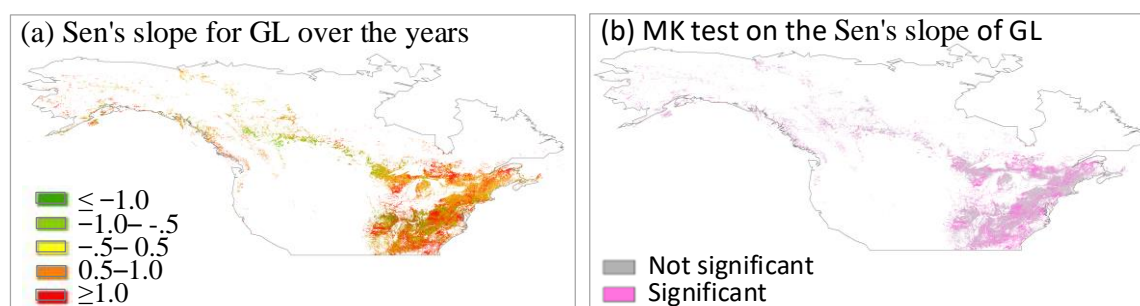

**Figure S1.** Temporal trajectory of GL in the deciduous forests during 2001-2020.

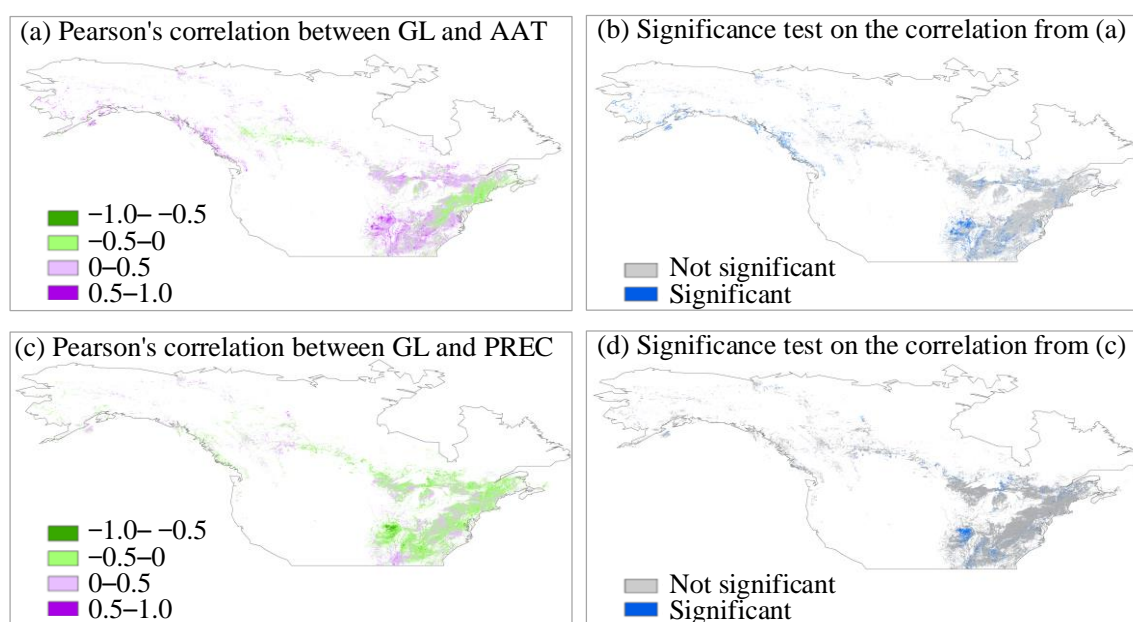

**Figure S2.** The impact of annual average temperature (AAT) and annual total precipitation (PREC) on GL in the deciduous forests.
